# Supplementary material
Source: publisher site journal article supplement (https://www.dovepress.com/article/404202)
Supplement: Supplementary file 1 [file get_supplementary_file.php]

Supplementary Material

# Molecular profiling of a multi-strain hypervirulent *Klebsiella pneumoniae* infection

# within a single patient

**Huijun Cao 1*,Shiwei Liang 1, 2*, Chenchen Zhang 2, Bao Liu 1, Ying Fei 1†**

*These authors contributed equally to this work.

**† Correspondence:** Ying Fei, Tel +86 13985509788, Email [feiying@gmc.edu.cn](mailto:feiying@gmc.edu.cn)

# Supplementary Figures and Tables

## Supplementary Tables

**Tanle S1.** PCR Primer sets utilized in the study

| **Carbapenase** | **Primer sequence**  **（5’-3’）** | **Amplicon (bp)** | **Annealing temperature**  **(℃)** |
| --- | --- | --- | --- |
|  | F:GCTACACCTAGCTCCACCTTC | 985 | 55 |
| R:ACAGTGGTTGGTAATCCATGC |
|  | F:TTGGTGGCATCGATTATCGG | 764 | 58 |
| R:TTGGTGGCATCGATTATCGG |
|  | F:AAAGTTATGCCGCACTCACC | 815 | 56 |
| R:TGCAACTTCATGTTATGCCG |
|  | F:GGCAGTCGCCCTAAAACAAA | 737 | 55 |
| R:TAGTTACTTGGCTGTGATGG |
|  | F:GGTGCATGCCCGGTGAAATC | 660 | 57 |
| R:ATGCTGGCCTTGGGGAACG |
| **Virulence** |  |  |  |
| *rmpA* | F:CATAAGAGTATTGGTTGACAG  R:CTTGCATGAGCCATCTTTCA | 460 | 58 |
| *mrkD* | F:AAGCTATCGCTGTACTTCCGGCA  R:GGCGTTGGCGCTCAGATAGG | 340 | 49 |
| *entB* | F:GTCAACTGGGCCTTTGAGCCGTC  R:TATGGGCGTAAACGCCGGTGAT | 400 | 55 |
| *ybtS* | F:GACGGAAACAGCACGGTAAA  R:GAGCATAATAAGGCGAAAGA | 256 | 55 |
| *wcaG* | F:GGTTGGKTCAGCAATCGTA  R:ACTATTCCGCCAACTTTTGC | 169 | 49 |
| *KfuBC* | F:GGCCTTTGTCCAGAGCTACG  R:GGGTCTGGCGCAGAGTATGC | 638 | 55 |
| **Serotype** |  |  |  |
| K1 | F:GGTGCTCTTTACATCATTGC  R:GCAATGGCCATTTGCGTTAG | 1283 | 58 |
| K2 | F: CAACCATGGTGGTCGATTAG  R:TGGTAGCCATATCCCTTTGG | 641 | 58 |
| K5 | F:TGGTAGTGATGCTCGCGA  R:CCTGAACCCACCCCAATC | 280 | 58 |
| K20 | F:CGGTGCTACAGTGCATCATT  R:CCTGAACCCACCCCAATC | 741 | 58 |
| K54 | F:CATTAGCTCAGTGGTTGGCT  R:GCTTGACAAACACCATAGCAG | 881 | 58 |
| K57 | F:CTCAGGGCTAGAAGTGTCAT  R:CACTAACCCAGAAAGTCGAG | 1037 | 58 |
| K64 | F:TCAGTTCCGACCCTGATGCAGGTA  R:GCCAGAGCAACTATCATCCAAAGCCA | 268 | 60 |
| K47 | F:GGACGCACAGTTTCCCAATTCGC  R:GCCCACATGAACCCACTTGGCA | 392 | 60 |
